# Supplementary material for: Microbiome Analysis via OTU and ASV-Based Pipelines—A Comparative Interpretation of Ecological Data in WWTP Systems
Source: MDPI journal article supplement (doi:10.3390/bioengineering9040146), 2022-03-29
Supplement: s1 [file s1]

# Microbiome Analysis via OTU and ASV-Based Pipelines—A Comparative Interpretation of Ecological Data in WWTP Systems

Jan Torsten Jeske \* and Claudia Gallert

Faculty of Technology, Microbiology–Biotechnology, University of Applied Science Emden/Leer,  
26723 Emden, Germany; claudia.gallert@hs-emden-leer.de

\* Correspondence: torsten.jeske@hs-emden-leer.de

**Table S1.** Phylum-level prokaryotic community composition by pipeline and treatment.

| Phylum               | Treatment | ASV   | OTU   | Δ of total Community |
|----------------------|-----------|-------|-------|----------------------|
| Abditibacteriota     | Control   | <0.01 | <0.01 | <0.01                |
| Acidobacteriota      |           | 1.12  | <0.01 | 1.12                 |
| Actinomycetota       |           | 1.13  | 1.00  | 0.12                 |
| Armatimonadota       |           | 0.40  | <0.01 | 0.40                 |
| Bacteroidota         |           | 7.96  | 8.09  | 0.13                 |
| Bdellovibrionota     |           | 0.01  | 0.01  | <0.01                |
| Caldatibacteriota    |           | 1.66  | 1.65  | 0.01                 |
| Caldisericota        |           | 0.09  | 0.09  | <0.01                |
| Campylobacterota     |           | <0.01 | <0.01 | <0.01                |
| Chloroflexota        |           | 0.82  | 0.71  | 0.11                 |
| Cloacimonadota       |           | 3.41  | 3.47  | 0.06                 |
| Coprothermobacterota |           | 16.46 | 18.53 | 2.07                 |
| Crenarchaeota        |           | <0.01 | <0.01 | <0.01                |
| Cyanobacteria        |           | 0.04  | <0.01 | 0.04                 |
| Dadabacteria         |           | <0.01 | <0.01 | <0.01                |
| Deferribacterota     |           | <0.01 | <0.01 | <0.01                |
| Deinococcota         |           | <0.01 | <0.01 | <0.01                |
| Dependentiae         |           | <0.01 | <0.01 | <0.01                |
| Desulfobacterota     |           | 0.19  | 0.18  | 0.01                 |
| Dictyoglomota        |           | 3.02  | 3.31  | 0.29                 |
| Elusimicrobiota      |           | <0.01 | <0.01 | <0.01                |
| Euryarchaeota        |           | 2.08  | 2.16  | 0.08                 |
| FCPU426              |           | <0.01 | <0.01 | <0.01                |
| Fibrobacterota       |           | <0.01 | <0.01 | <0.01                |
| Firmicutes           |           | 21.05 | 18.84 | 2.21                 |
| Fusobacteriota       |           | 0.03  | 0.02  | <0.01                |
| FW113                |           | <0.01 | <0.01 | <0.01                |
| Gemmatimonadota      |           | <0.01 | <0.01 | <0.01                |
| Halobacterota        |           | 2.96  | 3.14  | 0.18                 |
| Hydrogenedentes      |           | 0.38  | 0.38  | <0.01                |
| Hydrothermae         |           | 1.49  | <0.01 | 1.49                 |
| Latescibacterota     |           | <0.01 | <0.01 | <0.01                |
| LCP-89               |           | <0.01 | <0.01 | <0.01                |

|                               |            |       |       |       |
|-------------------------------|------------|-------|-------|-------|
| Marinimicrobia (SAR406 clade) |            | <0.01 | <0.01 | <0.01 |
| MBNT15                        |            | <0.01 | <0.01 | <0.01 |
| Methylomirabilota             |            | <0.01 | <0.01 | <0.01 |
| Myxococcota                   |            | <0.01 | <0.01 | <0.01 |
| Nitrospirota                  |            | 0.06  | 0.05  | <0.01 |
| Patescibacteria               |            | 0.41  | 0.01  | 0.40  |
| Planctomycetota               |            | 0.08  | 0.05  | 0.02  |
| Proteobacteria                |            | 2.38  | 2.63  | 0.25  |
| Rs-K70 termite group          | Control    | <0.01 | <0.01 | <0.01 |
| SAR324 clade(Marine group B)  |            | 0.01  | <0.01 | 0.01  |
| Spirochaetota                 |            | 0.45  | 0.43  | 0.02  |
| Sumerlaeota                   |            | 0.06  | 0.02  | 0.03  |
| Sva0485                       |            | <0.01 | <0.01 | <0.01 |
| Synergistota                  |            | 13.58 | 15.50 | 1.92  |
| Thermoplasmatota              |            | 0.03  | 0.03  | <0.01 |
| Thermotogota                  |            | 18.25 | 19.47 | 1.23  |
| Verrucomicrobiota             |            | 0.15  | 0.22  | 0.07  |
| WPS-2                         |            | 0.01  | <0.01 | 0.01  |
| WS4                           |            | <0.01 | <0.01 | <0.01 |
| Abditibacteriota              | Experiment | <0.01 | <0.01 | <0.01 |
| Acidobacteriota               |            | 1.91  | 0.01  | 1.91  |
| Actinomycetota                |            | 2.11  | 1.92  | 0.19  |
| Armatimonadota                |            | 0.94  | <0.01 | 0.94  |
| Bacteroidota                  |            | 20.77 | 20.48 | 0.29  |
| Bdellovibrionota              |            | 0.01  | 0.02  | <0.01 |
| Caldatibacteriota             |            | 4.41  | 4.32  | 0.09  |
| Caldisericota                 |            | 0.07  | 0.08  | 0.01  |
| Campylobacterota              |            | 0.01  | 0.01  | <0.01 |
| Chloroflexota                 |            | 1.41  | 1.09  | 0.31  |
| Cloacimonadota                |            | 9.66  | 9.47  | 0.19  |
| Coprothermobacterota          |            | 52.16 | 56.64 | 4.48  |
| Crenarchaeota                 |            | 0.01  | <0.01 | 0.01  |
| Cyanobacteria                 |            | 0.04  | <0.01 | 0.04  |
| Dadabacteria                  |            | <0.01 | <0.01 | <0.01 |
| Deferribacterota              |            | <0.01 | <0.01 | <0.01 |
| Deinococcota                  |            | <0.01 | <0.01 | <0.01 |
| Dependentiae                  |            | <0.01 | <0.01 | <0.01 |
| Desulfobacterota              |            | 0.23  | 0.22  | 0.01  |
| Dictyoglomota                 |            | 11.39 | 11.91 | 0.52  |
| Elusimicrobiota               |            | <0.01 | <0.01 | <0.01 |
| Euryarchaeota                 |            | 5.80  | 5.75  | 0.05  |
| FCPU426                       |            | <0.01 | <0.01 | <0.01 |
| Fibrobacterota                |            | <0.01 | <0.01 | <0.01 |
| Firmicutes                    |            | 41.86 | 35.78 | 6.08  |
| Fusobacteriota                |            | 0.02  | 0.02  | <0.01 |
| FW113                         |            | <0.01 | <0.01 | <0.01 |
| Gemmatimonadota               |            | <0.01 | <0.01 | <0.01 |
| Halobacterota                 |            | 8.13  | 8.35  | 0.22  |
| Hydrogenedentes               |            | 0.71  | 0.70  | 0.01  |
| Hydrothermae                  |            | 2.14  | <0.01 | 2.14  |
| Latescibacterota              |            | <0.01 | <0.01 | <0.01 |

|                               |            |        |       |       |
|-------------------------------|------------|--------|-------|-------|
| LCP-89                        | Experiment | <0.01  | <0.01 | <0.01 |
| Marinimicrobia (SAR406 clade) |            | <0.01  | <0.01 | <0.01 |
| MBNT15                        |            | <0.01  | <0.01 | <0.01 |
| Methylospirillum              |            | <0.01  | <0.01 | <0.01 |
| Myxococcota                   |            | <0.01  | <0.01 | <0.01 |
| Nitrospirillum                |            | 0.12   | 0.12  | <0.01 |
| Patescibacteria               |            | 0.50   | 0.02  | 0.48  |
| Planctomycetota               |            | 0.21   | 0.15  | 0.06  |
| Proteobacteria                |            | 4.07   | 4.46  | 0.38  |
| Rs-K70 termite group          |            | <0.01  | <0.01 | <0.01 |
| SAR324 clade(Marine group B)  |            | <0.01  | <0.01 | <0.01 |
| Spirochaetota                 |            | 0.37   | 0.34  | 0.03  |
| Sumerlaeota                   |            | 0.14   | 0.10  | 0.04  |
| Sva0485                       |            | <0.01  | <0.01 | <0.01 |
| Synergistota                  |            | 38.61  | 42.94 | 4.32  |
| Thermoplasmatota              |            | 0.07   | 0.05  | 0.02  |
| Thermotogota                  |            | 90.96  | 94.33 | 3.37  |
| Verrucomicrobiota             |            | 0.52   | 0.73  | 0.21  |
| WPS-2                         |            | 0.01   | <0.01 | 0.01  |
| WS4                           |            | <0.01  | <0.01 | <0.01 |
| Abditibacteriota              | Inoculum   | <0.01  | <0.01 | <0.01 |
| Acidobacteriota               |            | 0.25   | 0.05  | 0.20  |
| Actinomycetota                |            | 3.08   | 2.72  | 0.36  |
| Armatimonadota                |            | 0.03   | 0.04  | 0.01  |
| Bacteroidota                  |            | 2<0.01 | 19.29 | 0.71  |
| Bdellovibrionota              |            | 0.12   | 0.13  | 0.01  |
| Caldatibacteriota             |            | 1.16   | 1.12  | 0.04  |
| Caldisericota                 |            | 0.03   | 0.03  | <0.01 |
| Campylobacterota              |            | <0.01  | <0.01 | <0.01 |
| Chloroflexota                 |            | 1.24   | 0.95  | 0.29  |
| Cloacimonadota                |            | <0.01  | 0.01  | 0.01  |
| Coprothermobacterota          |            | 19.81  | 25.32 | 5.51  |
| Crenarchaeota                 |            | <0.01  | <0.01 | <0.01 |
| Cyanobacteria                 |            | 0.01   | <0.01 | 0.01  |
| Dadabacteria                  |            | <0.01  | <0.01 | <0.01 |
| Deferribacterota              |            | <0.01  | <0.01 | <0.01 |
| Deinococcota                  |            | <0.01  | <0.01 | <0.01 |
| Dependentiae                  |            | 0.03   | 0.02  | 0.01  |
| Desulfobacterota              |            | 0.01   | 0.02  | 0.01  |
| Dictyoglomota                 |            | 0.78   | 0.75  | 0.04  |
| Elusimicrobiota               |            | <0.01  | <0.01 | <0.01 |
| Euryarchaeota                 |            | 0.55   | 0.48  | 0.07  |
| FCPU426                       |            | <0.01  | <0.01 | <0.01 |
| Fibrobacterota                | Inoculum   | <0.01  | <0.01 | <0.01 |
| Firmicutes                    |            | 14.63  | 14.31 | 0.33  |
| Fusobacteriota                |            | 0.01   | 0.01  | <0.01 |
| FW113                         |            | <0.01  | <0.01 | <0.01 |
| Gemmatimonadota               |            | <0.01  | <0.01 | <0.01 |
| Halobacterota                 |            | 0.25   | 0.20  | 0.05  |
| Hydrogenedentes               |            | 2.39   | 2.50  | 0.11  |
| Hydrothermae                  |            | 0.08   | <0.01 | 0.08  |

|                               |       |       |       |       |
|-------------------------------|-------|-------|-------|-------|
| Latescibacterota              |       | <0.01 | <0.01 | <0.01 |
| LCP-89                        |       | <0.01 | <0.01 | <0.01 |
| Marinimicrobia (SAR406 clade) |       | <0.01 | <0.01 | <0.01 |
| MBNT15                        |       | <0.01 | <0.01 | <0.01 |
| Methylomirabilota             |       | <0.01 | <0.01 | <0.01 |
| Myxococcota                   |       | <0.01 | <0.01 | <0.01 |
| Nitrospirota                  |       | 0.22  | 0.20  | 0.02  |
| Patescibacteria               |       | 3.25  | 0.14  | 3.10  |
| Planctomycetota               |       | 0.10  | 0.07  | 0.03  |
| Proteobacteria                |       | 7.11  | 6.08  | 1.03  |
| Rs-K70 termite group          |       | <0.01 | <0.01 | <0.01 |
| SAR324 clade(Marine group B)  |       | <0.01 | <0.01 | <0.01 |
| Spirochaetota                 |       | 0.04  | 0.03  | 0.01  |
| Sumerlaeota                   |       | 0.29  | 0.28  | 0.01  |
| Sva0485                       |       | <0.01 | <0.01 | <0.01 |
| Synergistota                  |       | 2.58  | 2.63  | 0.06  |
| Thermoplasmatota              |       | <0.01 | <0.01 | <0.01 |
| Thermotogota                  |       | 21.60 | 22.22 | 0.62  |
| Verrucomicrobiota             |       | 0.29  | 0.41  | 0.12  |
| WPS-2                         |       | 0.04  | <0.01 | 0.04  |
| WS4                           |       | <0.01 | <0.01 | <0.01 |
| Abditibacteriota              | PWASS | <0.01 | <0.01 | <0.01 |
| Acidobacteriota               |       | 1.22  | 0.29  | 0.92  |
| Actinomycetota                |       | 5.50  | 5.25  | 0.25  |
| Armatimonadota                |       | 0.02  | 0.03  | 0.01  |
| Bacteroidota                  |       | 8.06  | 7.96  | 0.10  |
| Bdellovibrionota              |       | 0.25  | 0.19  | 0.06  |
| Caldatibacteriota             |       | 0.36  | 0.25  | 0.11  |
| Caldisericota                 |       | 0.43  | 0.59  | 0.15  |
| Campylobacterota              |       | 5.61  | 5.55  | 0.06  |
| Chloroflexota                 |       | 7.16  | 7.06  | 0.10  |
| Cloacimonadota                |       | 0.26  | 0.21  | 0.05  |
| Coprothermobacterota          |       | 0.01  | 0.06  | 0.05  |
| Crenarchaeota                 |       | <0.01 | <0.01 | <0.01 |
| Cyanobacteria                 |       | 0.04  | 0.03  | 0.01  |
| Dadabacteria                  | PWASS | <0.01 | <0.01 | <0.01 |
| Deferribacterota              |       | <0.01 | <0.01 | <0.01 |
| Deinococcota                  |       | <0.01 | <0.01 | <0.01 |
| Dependentiae                  |       | 0.03  | 0.02  | <0.01 |
| Desulfobacterota              |       | 0.97  | 1.03  | 0.06  |
| Dictyoglomota                 |       | <0.01 | 0.01  | 0.01  |
| Elusimicrobiota               |       | <0.01 | <0.01 | <0.01 |
| Euryarchaeota                 |       | 0.07  | 0.06  | 0.01  |
| FCPU426                       |       | <0.01 | <0.01 | <0.01 |
| Fibrobacterota                |       | 0.01  | 0.01  | <0.01 |
| Firmicutes                    |       | 24.68 | 24.90 | 0.21  |
| Fusobacteriota                |       | 3.50  | 3.33  | 0.17  |
| FW113                         |       | <0.01 | <0.01 | <0.01 |
| Gemmatimonadota               |       | 0.02  | 0.03  | 0.01  |
| Halobacterota                 |       | 1.39  | 1.80  | 0.41  |
| Hydrogenedentes               |       | 0.44  | 0.49  | 0.05  |

---

|                               |       |       |       |
|-------------------------------|-------|-------|-------|
| Hydrothermae                  | <0.01 | <0.01 | <0.01 |
| Latescibacterota              | 0.01  | <0.01 | 0.01  |
| LCP-89                        | <0.01 | <0.01 | <0.01 |
| Marinimicrobia (SAR406 clade) | 0.01  | <0.01 | 0.01  |
| MBNT15                        | <0.01 | <0.01 | <0.01 |
| Methylomirabilota             | <0.01 | 0.01  | <0.01 |
| Myxococcota                   | 0.13  | 0.09  | 0.04  |
| Nitrospirota                  | 0.08  | 0.09  | 0.01  |
| Patescibacteria               | 1.02  | 0.02  | 0.99  |
| Planctomycetota               | 0.17  | 0.18  | <0.01 |
| Proteobacteria                | 34.55 | 36.12 | 1.58  |
| Rs-K70 termite group          | <0.01 | <0.01 | <0.01 |
| SAR324 clade(Marine group B)  | 0.23  | <0.01 | 0.23  |
| Spirochaetota                 | 0.47  | 0.48  | 0.01  |
| Sumerlaeota                   | 0.03  | 0.02  | 0.01  |
| Sva0485                       | <0.01 | <0.01 | <0.01 |
| Synergistota                  | 2.05  | 2.48  | 0.42  |
| Thermoplasmata                | <0.01 | <0.01 | <0.01 |
| Thermotogota                  | 0.06  | 0.13  | 0.07  |
| Verrucomicrobiota             | 1.06  | 1.24  | 0.18  |
| WPS-2                         | 0.09  | <0.01 | 0.09  |
| WS4                           | <0.01 | <0.01 | <0.01 |

---
